# Supplementary material for: Risk factors for excess all-cause mortality during the first wave of the COVID-19 pandemic in England: A retrospective cohort study of primary care data
Source: PLOS journal article supplement (doi:10.1371/journal.pone.0260381), 2021-12-09
Supplement: S1 (10.1371/journal.pone.0260381.s001) [file journal.pone.0260381.s001.pdf]

## S1 Appendix. Defining Usual Mortality Ratio, Excess Mortality Ratio and True Pandemic Interaction

Consider the simplest situation, a single pandemic period with a combined non-pandemic comparison or reference period, and a dichotomous risk factor. Using upper case for actual rates or rate ratios, and lower case for the corresponding parameters from log-linear modelling (we will use a Poisson model):

$$\text{Log}_e(\text{mortality rate}) = a + u * x_{1i} + p * x_{2i} + i * x_{3i}$$

where a = constant, u = usual effect of exposure, p = pandemic period, i = interaction of exposure and pandemic;  $x_{1i}$  is a dichotomous variable indicating exposure (=0 if not exposed, =1 if exposed);  $x_{2i}$  is a dichotomous variable indicating pandemic (=0 if 2015-9, =1 if 2020);  $x_{3i}$  is a dichotomous variable representing the interaction of exposure and pandemic (=1 if period=2020 and exposed, else =0).

| Period | Exposure | Modelled mortality rate |
|--------|----------|-------------------------|
| 0      | 0        | A = exp [a]             |
| 0      | 1        | B = exp [a + u]         |
| 1      | 0        | C = exp [a + p]         |
| 1      | 1        | D = exp [a + u + p + i] |

The observed rates C and D are mixtures of “usual” and “excess” deaths. We want to assess whether the effect of the exposure differs between these two components, expressed as a “true interaction rate ratio”. We can estimate the relative effect of the exposure on the “usual” deaths directly ( $\text{exp}(e) = E$ ), but we can only estimate the effect of the exposure on the “excess” deaths indirectly, as follows:

| Exposure                  | “Usual” Rate | Pandemic Rate     | Excess Rate = Pandemic Rate – Usual Rate        |
|---------------------------|--------------|-------------------|-------------------------------------------------|
| 0                         | A            | C = A * P         | (A * P) – A = A * (P - 1)                       |
| 1                         | B = A * U    | D = A * U * P * I | (A * U * P * I) - (A * U) = A * U * (P * I - 1) |
| Relative effect of 1 vs 0 | U            | U * I             | $\frac{U * (P * I - 1)}{P - 1} = E$             |

where A = usual mortality in non-exposed, U = relative effect of exposure on usual deaths, P =  $\text{exp}[p]$  = relative effect of pandemic on non-exposed deaths, I =  $\text{exp}[i]$  = interaction effect of pandemic and exposure (relative effect of pandemic on exposed vs. non-exposed *or* relative effect of exposure in pandemic vs non-pandemic periods), E = relative effect of exposure on excess deaths

The “true interaction ratio” (comparing excess to usual deaths) (T) is thus:

$$T = \frac{E}{U} = \frac{P * I - 1}{P - 1}$$

Which can be rewritten as:

$$E = T * U$$

On the log-scale this can be-written as:

$$\ln(E) = \ln(T) + \ln(U) = \left[ \frac{\ln(T)}{\ln(I)} \right] * \ln(I) + \ln(U) = k * \ln(I) + \ln(U)$$

where k is the scalar applied to the *lincom* command in Stata to provide a 95% confidence interval for E based on the assumption that the Wald test for I and E is the same.

Note, in the text we refer to U and E as the UMR (Usual Mortality Ratio) and EMR (Excess Mortality Ratio) respectively.
