# Supplementary material for: Risk factors for excess all-cause mortality during the first wave of the COVID-19 pandemic in England: A retrospective cohort study of primary care data
Source: PLOS journal article supplement (doi:10.1371/journal.pone.0260381), 2021-12-09
Supplement: S2 (10.1371/journal.pone.0260381.s002) [file journal.pone.0260381.s002.pdf]

S1 Figure: Weekly excess mortality during 2020 using CPRD versus ONS national figures for England

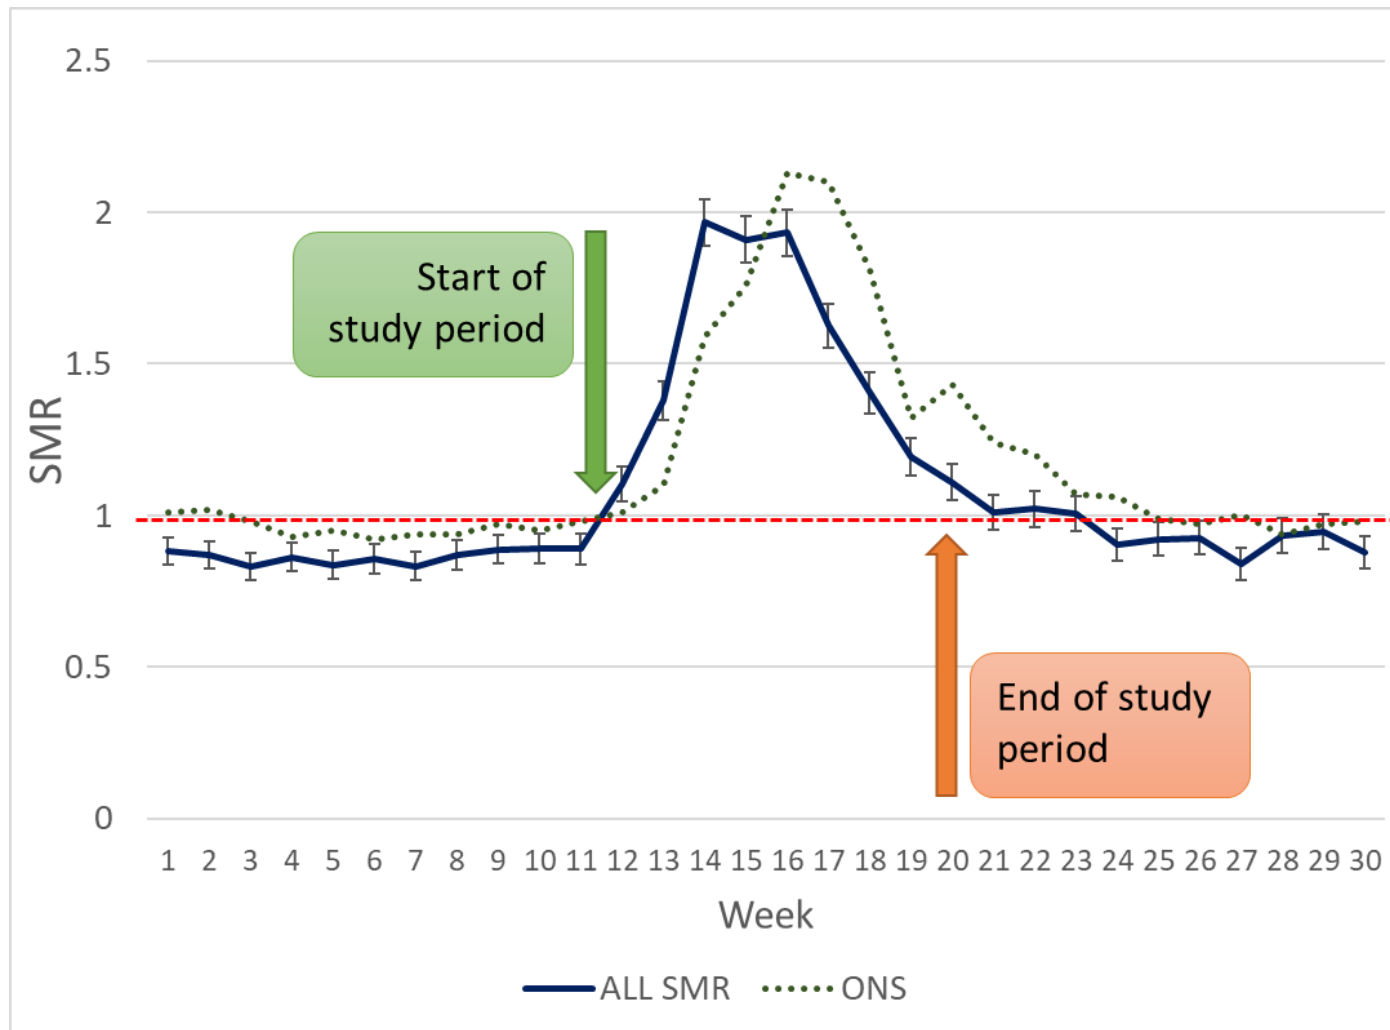

ONS – Office for National Statistics. Excess mortality figures for England in 2020 available at <https://www.ons.gov.uk/peoplepopulationandcommunity/birthsdeathsandmarriages/deaths/datasets/excessdeathsinenglandandwales2020final>
