# Supplementary material for: Risk factors for excess all-cause mortality during the first wave of the COVID-19 pandemic in England: A retrospective cohort study of primary care data
Source: PLOS journal article supplement (doi:10.1371/journal.pone.0260381), 2021-12-09
Supplement: S4 (10.1371/journal.pone.0260381.s004) [file journal.pone.0260381.s004.pdf]

**S1 Table: Number of total patients and recorded deaths in 2020 and 2015-9**

|                       | <b>2020<br/>Total<br/>patients</b> | <b>2020<br/>% of<br/>total</b> | <b>2020<br/>Total<br/>deaths</b> | <b>2020<br/>% who<br/>died</b> | <b>2015-9<br/>Average<br/>total<br/>patients</b> | <b>2015-9<br/>Average<br/>total<br/>deaths</b> | <b>2015-9<br/>% who<br/>died</b> |
|-----------------------|------------------------------------|--------------------------------|----------------------------------|--------------------------------|--------------------------------------------------|------------------------------------------------|----------------------------------|
| <b>Sex</b>            |                                    |                                |                                  |                                |                                                  |                                                |                                  |
| - Females             | 2,440,573                          | 50.47%                         | 8,327                            | 0.34%                          | 2,318,138.0                                      | 5,286.4                                        | 0.23%                            |
| - Males               | 2,395,135                          | 49.53%                         | 8,408                            | 0.35%                          | 2,261,175.4                                      | 5,040.0                                        | 0.22%                            |
| <b>Age</b>            |                                    |                                |                                  |                                |                                                  |                                                |                                  |
| - 30 to 39            | 1,107,502                          | 22.90%                         | 146                              | 0.01%                          | 1,031,082.8                                      | 110.6                                          | 0.01%                            |
| - 40 to 49            | 1,008,371                          | 20.85%                         | 355                              | 0.04%                          | 1,007,627.2                                      | 283.4                                          | 0.03%                            |
| - 50 to 59            | 1,026,969                          | 21.24%                         | 904                              | 0.09%                          | 957,067.0                                        | 611.0                                          | 0.06%                            |
| - 60 to 69            | 756,480                            | 15.64%                         | 1,759                            | 0.23%                          | 732,154.4                                        | 1,229.2                                        | 0.17%                            |
| - 70 to 79            | 587,255                            | 12.14%                         | 3,675                            | 0.63%                          | 525,487.4                                        | 2,266.2                                        | 0.43%                            |
| - 80 to 89            | 287,517                            | 5.95%                          | 6,190                            | 2.15%                          | 267,730.0                                        | 3,664.8                                        | 1.37%                            |
| - 90 to 104           | 61,614                             | 1.27%                          | 3,706                            | 6.01%                          | 58,164.6                                         | 2,161.2                                        | 3.72%                            |
| <b>Smoking</b>        |                                    |                                |                                  |                                |                                                  |                                                |                                  |
| - Never               | 2,184,223                          | 45.17%                         | 5,772                            | 0.26%                          | 2,059,639.6                                      | 3,432.6                                        | 0.17%                            |
| - Ex                  | 1,660,167                          | 34.33%                         | 8,557                            | 0.52%                          | 1,537,885.0                                      | 4,923.8                                        | 0.32%                            |
| - Current             | 883,863                            | 18.28%                         | 1,974                            | 0.22%                          | 861,890.4                                        | 1,549.6                                        | 0.18%                            |
| - Unknown             | 107,455                            | 2.22%                          | 432                              | 0.40%                          | 119,898.4                                        | 420.4                                          | 0.35%                            |
| <b>Ethnicity</b>      |                                    |                                |                                  |                                |                                                  |                                                |                                  |
| - White               | 3,284,482                          | 67.92%                         | 12,173                           | 0.37%                          | 3,105,139.4                                      | 7,247.4                                        | 0.23%                            |
| - Black               | 139,459                            | 2.88%                          | 365                              | 0.26%                          | 126,407.6                                        | 123.0                                          | 0.10%                            |
| - Asian               | 288,974                            | 5.98%                          | 484                              | 0.17%                          | 247,025.4                                        | 194.6                                          | 0.08%                            |
| - Mixed               | 89,162                             | 1.84%                          | 180                              | 0.20%                          | 73,574.4                                         | 66.2                                           | 0.09%                            |
| - Other               | 139,479                            | 2.88%                          | 218                              | 0.16%                          | 111,446.0                                        | 83.4                                           | 0.07%                            |
| - Unknown             | 894,152                            | 18.49%                         | 3,315                            | 0.37%                          | 915,720.6                                        | 2,611.8                                        | 0.29%                            |
| <b>Deprivation</b>    |                                    |                                |                                  |                                |                                                  |                                                |                                  |
| - IMD1 (Least)        | 1,140,503                          | 23.59%                         | 3,645                            | 0.32%                          | 1,104,722.4                                      | 2,289.0                                        | 0.21%                            |
| - IMD2                | 997,546                            | 20.63%                         | 3,523                            | 0.35%                          | 952,221.4                                        | 2,153.8                                        | 0.23%                            |
| - IMD3                | 958,205                            | 19.82%                         | 3,388                            | 0.35%                          | 904,390.4                                        | 2,078.0                                        | 0.23%                            |
| - IMD4                | 917,876                            | 18.98%                         | 3,138                            | 0.34%                          | 854,847.0                                        | 1,930.6                                        | 0.23%                            |
| - IMD5 (Most)         | 821,578                            | 16.99%                         | 3,041                            | 0.37%                          | 763,132.2                                        | 1,875.0                                        | 0.25%                            |
| <b>BMI</b>            |                                    |                                |                                  |                                |                                                  |                                                |                                  |
| - <20 vs 20-30        | 250,583                            | 5.18%                          | 2,119                            | 0.85%                          | 234,603.4                                        | 1,327.4                                        | 0.57%                            |
| - 20-30               | 2,968,693                          | 61.39%                         | 9,012                            | 0.30%                          | 2,848,523.0                                      | 5,551.2                                        | 0.19%                            |
| - 30-35 vs 20-30      | 724,659                            | 14.99%                         | 2,037                            | 0.28%                          | 679,379.6                                        | 1,171.0                                        | 0.17%                            |
| - 35-40 vs 20-30      | 268,650                            | 5.56%                          | 744                              | 0.28%                          | 244,690.0                                        | 415.0                                          | 0.17%                            |
| - 40+ vs 20-30        | 147,084                            | 3.04%                          | 507                              | 0.34%                          | 129,771.6                                        | 250.0                                          | 0.19%                            |
| - Unknown             | 476,039                            | 9.84%                          | 2,316                            | 0.49%                          | 442,345.8                                        | 1,611.8                                        | 0.36%                            |
| <b>Region</b>         |                                    |                                |                                  |                                |                                                  |                                                |                                  |
| - Non-London          | 3,999,810                          | 82.71%                         | 14,407                           | 0.36%                          | 3,818,522.8                                      | 9,193.4                                        | 0.24%                            |
| - London              | 835,898                            | 17.29%                         | 2,328                            | 0.28%                          | 760,790.6                                        | 1,133.0                                        | 0.15%                            |
| <b>Care Home</b>      |                                    |                                |                                  |                                |                                                  |                                                |                                  |
| - Yes                 | 27,076                             | 0.56%                          | 1,862                            | 6.88%                          | 22,155.4                                         | 725.0                                          | 3.27%                            |
| <b>Co-morbidities</b> |                                    |                                |                                  |                                |                                                  |                                                |                                  |
| - Atrial Fibrillation | 166,118                            | 3.44%                          | 3,709                            | 2.23%                          | 145,533.0                                        | 2,202.6                                        | 1.51%                            |
| - Asthma              | 677,009                            | 14.00%                         | 2,253                            | 0.33%                          | 607,561.0                                        | 1,347.8                                        | 0.22%                            |
| - Cancer              | 286,975                            | 5.93%                          | 4,489                            | 1.56%                          | 255,205.0                                        | 3,088.4                                        | 1.21%                            |
| - Coronary Heart Dis. | 227,418                            | 4.70%                          | 3,666                            | 1.61%                          | 222,334.6                                        | 2,325.0                                        | 1.05%                            |
| - Chronic Kidney Dis. | 268,605                            | 5.55%                          | 5,487                            | 2.04%                          | 258,943.8                                        | 3,154.0                                        | 1.22%                            |

|                           | <b>2020<br/>Total<br/>patients</b> | <b>2020<br/>% of<br/>total</b> | <b>2020<br/>Total<br/>deaths</b> | <b>2020<br/>% who<br/>died</b> | <b>2015-9<br/>Average<br/>total<br/>patients</b> | <b>2015-9<br/>Average<br/>total<br/>deaths</b> | <b>2015-9<br/>% who<br/>died</b> |
|---------------------------|------------------------------------|--------------------------------|----------------------------------|--------------------------------|--------------------------------------------------|------------------------------------------------|----------------------------------|
| - COPD                    | 147,546                            | 3.05%                          | 2,383                            | 1.62%                          | 134,682.6                                        | 1,569.4                                        | 1.17%                            |
| - Dementia                | 60,259                             | 1.25%                          | 4,639                            | 7.70%                          | 57,535.2                                         | 2,049.8                                        | 3.56%                            |
| - Diabetes                | 414,718                            | 8.58%                          | 4,435                            | 1.07%                          | 370,730.0                                        | 2,332.0                                        | 0.63%                            |
| - Epilepsy                | 72,202                             | 1.49%                          | 576                              | 0.80%                          | 68,330.8                                         | 319.2                                          | 0.47%                            |
| - Heart Failure           | 69,677                             | 1.44%                          | 2,331                            | 3.35%                          | 59,474.0                                         | 1,341.0                                        | 2.25%                            |
| - Hypertension            | 1,072,045                          | 22.17%                         | 9,932                            | 0.93%                          | 1,012,981.6                                      | 5,741.8                                        | 0.57%                            |
| - Learning Disability     | 22,453                             | 0.46%                          | 189                              | 0.84%                          | 19,830.6                                         | 75.4                                           | 0.38%                            |
| - Mental Health           | 61,017                             | 1.26%                          | 528                              | 0.87%                          | 54,660.2                                         | 255.2                                          | 0.47%                            |
| - Osteoarthritis          | 139,165                            | 2.88%                          | 2,569                            | 1.85%                          | 124,824.0                                        | 1,306.8                                        | 1.05%                            |
| - Rheumatoid<br>Arthritis | 47,571                             | 0.98%                          | 449                              | 0.94%                          | 42,962.8                                         | 254.8                                          | 0.59%                            |
| - Stroke or TIA           | 136,077                            | 2.81%                          | 3,056                            | 2.25%                          | 127,865.0                                        | 1,774.8                                        | 1.39%                            |
