# Supplementary material for: Risk factors for excess all-cause mortality during the first wave of the COVID-19 pandemic in England: A retrospective cohort study of primary care data
Source: PLOS journal article supplement (doi:10.1371/journal.pone.0260381), 2021-12-09
Supplement: S6 (10.1371/journal.pone.0260381.s006) [file journal.pone.0260381.s006.pdf]

**S3 Table: Mortality ratios for 2020 and 2015-9 (Usual) with corresponding excess mortality ratio (EMR) and true pandemic interaction (TPI) for sex, smoking, ethnicity, deprivation, BMI and region stratified by age**

|                                   | <b>2020 Mortality Ratio (95% CI)</b> | <b>2015-9 Usual Mortality Ratio (UMR) (95%CI)</b> | <b>2020 Excess Mortality Ratio (EMR) (95%CI)</b> | <b>True Pandemic Interaction* (95%CI)</b> |
|-----------------------------------|--------------------------------------|---------------------------------------------------|--------------------------------------------------|-------------------------------------------|
| <b>Sex (Male vs Female)</b>       |                                      |                                                   |                                                  |                                           |
| - 30 to 64                        | 1.430 (1.322,1.546)                  | 1.407 (1.349,1.468)                               | 1.492 (1.097,2.029)                              | 1.060 (0.766,1.468)                       |
| - 65 to 79                        | 1.567 (1.474,1.666)                  | 1.503 (1.453,1.555)                               | 1.727 (1.388,2.150)                              | 1.149 (0.910,1.451)                       |
| - 80+                             | 1.348 (1.296,1.403)                  | 1.276 (1.246,1.306)                               | 1.479 (1.321,1.655)                              | 1.159 (1.026,1.310)                       |
| <b>Smoking (Ex vs Never)</b>      |                                      |                                                   |                                                  |                                           |
| - 30 to 64                        | 1.556 (1.418,1.706)                  | 1.530 (1.451,1.614)                               | 1.603 (1.210,2.124)                              | 1.048 (0.773,1.420)                       |
| - 65 to 79                        | 1.468 (1.367,1.576)                  | 1.603 (1.538,1.671)                               | 1.236 (0.989,1.545)                              | 0.771 (0.606,0.981)                       |
| - 80+                             | 1.193 (1.144,1.244)                  | 1.145 (1.116,1.174)                               | 1.275 (1.136,1.432)                              | 1.114 (0.982,1.264)                       |
| <b>Smoking (Current vs Never)</b> |                                      |                                                   |                                                  |                                           |
| - 30 to 64                        | 2.193 (1.982,2.426)                  | 2.969 (2.815,3.131)                               | 0.716 (0.429,1.197)                              | 0.241 (0.141,0.412)                       |
| - 60 to 79                        | 2.153 (1.963,2.361)                  | 2.724 (2.591,2.865)                               | 1.176 (0.826,1.675)                              | 0.432 (0.297,0.628)                       |
| - 80+                             | 1.153 (1.053,1.264)                  | 1.397 (1.331,1.467)                               | 0.741 (0.537,1.023)                              | 0.531 (0.377,0.747)                       |
| <b>Ethnicity (Black vs White)</b> |                                      |                                                   |                                                  |                                           |
| - 30 to 64                        | 1.703 (1.420,2.042)                  | 1.028 (0.902,1.171)                               | 3.622 (2.212,5.930)                              | 3.525 (2.018,6.156)                       |
| - 60 to 79                        | 1.906 (1.550,2.343)                  | 0.962 (0.821,1.126)                               | 4.045 (2.536,6.452)                              | 4.206 (2.438,7.257)                       |
| - 80+                             | 1.149 (0.975,1.354)                  | 0.762 (0.668,0.870)                               | 1.754 (1.224,2.513)                              | 2.301 (1.501,3.526)                       |
| <b>Ethnicity (Asian vs White)</b> |                                      |                                                   |                                                  |                                           |
| - 30 to 64                        | 1.220 (1.034,1.439)                  | 0.671 (0.593,0.759)                               | 2.779 (1.813,4.260)                              | 4.140 (2.539,6.751)                       |
| - 60 to 79                        | 1.071 (0.900,1.275)                  | 0.864 (0.772,0.967)                               | 1.541 (0.929,2.555)                              | 1.784 (1.021,3.117)                       |
| - 80+                             | 0.950 (0.824,1.094)                  | 0.836 (0.757,0.923)                               | 1.128 (0.789,1.612)                              | 1.350 (0.900,2.024)                       |
| <b>BMI (&lt;20 vs 20-30)</b>      |                                      |                                                   |                                                  |                                           |
| - 30 to 64                        | 2.920 (2.533,3.367)                  | 3.345 (3.112,3.595)                               | 1.614 (0.709,3.674)                              | 0.483 (0.206,1.131)                       |
| - 65 to 79                        | 3.410 (3.065,3.795)                  | 3.853 (3.637,4.081)                               | 2.322 (1.440,3.742)                              | 0.603 (0.365,0.995)                       |
| - 80+                             | 2.431 (2.295,2.575)                  | 2.324 (2.245,2.405)                               | 2.607 (2.232,3.047)                              | 1.122 (0.947,1.330)                       |
| <b>BMI (30-35 vs 20-30)</b>       |                                      |                                                   |                                                  |                                           |
| - 30 to 64                        | 1.137 (1.017,1.271)                  | 0.983 (0.923,1.047)                               | 1.611 (1.072,2.422)                              | 1.639 (1.061,2.533)                       |
| - 65 to 79                        | 1.098 (1.008,1.196)                  | 0.991 (0.944,1.041)                               | 1.360 (1.024,1.807)                              | 1.372 (1.011,1.862)                       |
| - 80+                             | 0.941 (0.878,1.008)                  | 0.939 (0.901,0.979)                               | 0.943 (0.775,1.146)                              | 1.004 (0.811,1.242)                       |
| <b>BMI (35-40 vs 20-30)</b>       |                                      |                                                   |                                                  |                                           |
| - 30 to 64                        | 1.568 (1.351,1.821)                  | 1.208 (1.104,1.322)                               | 2.677 (1.638,4.377)                              | 2.216 (1.302,3.773)                       |
| - 65 to 79                        | 1.346 (1.186,1.526)                  | 1.305 (1.214,1.402)                               | 1.446 (0.919,2.274)                              | 1.108 (0.683,1.798)                       |
| - 80+                             | 1.132 (1.003,1.279)                  | 1.127 (1.046,1.214)                               | 1.141 (0.810,1.609)                              | 1.013 (0.695,1.476)                       |
| <b>BMI (40- vs 20-30)</b>         |                                      |                                                   |                                                  |                                           |
| - 30 to 64                        | 3.187 (2.753,3.689)                  | 2.184 (1.987,2.401)                               | 6.274 (4.032,9.761)                              | 2.873 (1.766,4.671)                       |
| - 65 to 79                        | 2.406 (2.081,2.781)                  | 1.929 (1.760,2.114)                               | 3.580 (2.312,5.544)                              | 1.856 (1.150,2.997)                       |
| - 80+                             | 1.449 (1.186,1.769)                  | 1.605 (1.400,1.840)                               | 1.190 (0.638,2.221)                              | 0.741 (0.377,1.456)                       |
| <b>IMD (2 vs 1 - Least)</b>       |                                      |                                                   |                                                  |                                           |
| - 30 to 64                        | 1.267 (1.109,1.448)                  | 1.169 (1.088,1.255)                               | 1.599 (0.917,2.790)                              | 1.369 (0.761,2.460)                       |
| - 65 to 79                        | 1.205 (1.095,1.326)                  | 1.146 (1.086,1.208)                               | 1.364 (0.956,1.945)                              | 1.190 (0.816,1.737)                       |
| - 80+                             | 1.154 (1.090,1.223)                  | 1.115 (1.078,1.152)                               | 1.228 (1.036,1.457)                              | 1.102 (0.916,1.326)                       |
| <b>IMD (3 vs 1 - Least)</b>       |                                      |                                                   |                                                  |                                           |
| - 30 to 64                        | 1.465 (1.285,1.670)                  | 1.389 (1.296,1.488)                               | 1.722 (0.976,3.038)                              | 1.240 (0.683,2.252)                       |
| - 65 to 79                        | 1.387 (1.260,1.526)                  | 1.338 (1.270,1.411)                               | 1.515 (1.055,2.175)                              | 1.132 (0.771,1.662)                       |
| - 80+                             | 1.192 (1.124,1.264)                  | 1.138 (1.099,1.177)                               | 1.293 (1.088,1.537)                              | 1.137 (0.943,1.371)                       |
| <b>IMD (4 vs 1 - Least)</b>       |                                      |                                                   |                                                  |                                           |

|                               | <b>2020 Mortality Ratio (95% CI)</b> | <b>2015-9 Usual Mortality Ratio (UMR) (95%CI)</b> | <b>2020 Excess Mortality Ratio (EMR) (95%CI)</b> | <b>True Pandemic Interaction* (95%CI)</b> |
|-------------------------------|--------------------------------------|---------------------------------------------------|--------------------------------------------------|-------------------------------------------|
| - 30 to 64                    | 1.838 (1.619,2.087)                  | 1.704 (1.592,1.823)                               | 2.291 (1.344,3.904)                              | 1.345 (0.767,2.357)                       |
| - 65 to 79                    | 1.704 (1.548,1.876)                  | 1.625 (1.541,1.714)                               | 1.915 (1.340,2.735)                              | 1.178 (0.806,1.722)                       |
| - 80+                         | 1.258 (1.183,1.338)                  | 1.191 (1.149,1.235)                               | 1.383 (1.155,1.655)                              | 1.161 (0.955,1.411)                       |
| <b>IMD (5 vs 1 - Least)</b>   |                                      |                                                   |                                                  |                                           |
| - 30 to 64                    | 2.485 (2.199,2.808)                  | 2.335 (2.189,2.492)                               | 2.987 (1.770,5.041)                              | 1.279 (0.737,2.218)                       |
| - 65 to 79                    | 2.355 (2.142,2.588)                  | 2.167 (2.056,2.283)                               | 2.857 (2.040,4.002)                              | 1.319 (0.921,1.889)                       |
| - 80+                         | 1.457 (1.366,1.555)                  | 1.322 (1.273,1.373)                               | 1.710 (1.425,2.052)                              | 1.294 (1.061,1.578)                       |
| <b>Region (London vs Non)</b> |                                      |                                                   |                                                  |                                           |
| - 30 to 64                    | 1.424 (1.308,1.550)                  | 1.037 (0.983,1.094)                               | 2.454 (1.914,3.145)                              | 2.367 (1.802,3.109)                       |
| - 65 to 79                    | 1.220 (1.167,1.276)                  | 0.943 (0.917,0.971)                               | 1.785 (1.589,2.006)                              | 1.893 (1.664,2.152)                       |
| - 80+                         | 1.175 (1.122,1.230)                  | 1.130 (1.101,1.160)                               | 1.271 (1.094,1.475)                              | 1.124 (0.958,1.321)                       |

\* - Defined as the ratio of the EMR to the UMR (see S1 Appendix). Note that all models adjust for age and sex.
