# Supplementary material for: Risk factors for excess all-cause mortality during the first wave of the COVID-19 pandemic in England: A retrospective cohort study of primary care data
Source: PLOS journal article supplement (doi:10.1371/journal.pone.0260381), 2021-12-09
Supplement: S8 (10.1371/journal.pone.0260381.s008) [file journal.pone.0260381.s008.pdf]

**S5 Table: Mortality ratios for 2020 and 2015-9 (Usual) with corresponding excess mortality ratio (EMR) and true pandemic interaction (TPI) for selected co-morbidities stratified by care home residence**

|                            | <b>2020 Mortality Ratio (95% CI)</b> | <b>2015-9 Usual Mortality Ratio (UMR) (95%CI)</b> | <b>2020 Excess Mortality Ratio (EMR) (95%CI)</b> | <b>True Pandemic Interaction* (95%CI)</b> |
|----------------------------|--------------------------------------|---------------------------------------------------|--------------------------------------------------|-------------------------------------------|
| <b>Dementia</b>            |                                      |                                                   |                                                  |                                           |
| - Care Home only           | 1.897 (1.725,2.087)                  | 1.507 (1.409,1.612)                               | 2.308 (1.922,2.772)                              | 1.532 (1.240,1.892)                       |
| - No Care Home             | 4.652 (4.474,4.838)                  | 2.961 (2.887,3.037)                               | 9.716<br>(8.722,10.823)                          | 3.281 (2.915,3.692)                       |
| <b>Learning Disability</b> |                                      |                                                   |                                                  |                                           |
| - Care Home only           | 0.657 (0.518,0.833)                  | 0.692 (0.576,0.831)                               | 0.629 (0.402,0.985)                              | 0.909 (0.537,1.539)                       |
| - No Care Home             | 5.150 (4.273,6.207)                  | 3.455 (3.046,3.919)                               | 8.954<br>(5.550,14.447)                          | 2.592 (1.514,4.435)                       |
| <b>Mental Health</b>       |                                      |                                                   |                                                  |                                           |
| - Care Home only           | 0.806 (0.670,0.971)                  | 0.744 (0.646,0.856)                               | 0.857 (0.612,1.199)                              | 1.152 (0.774,1.714)                       |
| - No Care Home             | 3.011 (2.726,3.325)                  | 2.480 (2.333,2.636)                               | 4.214 (3.149,5.638)                              | 1.699 (1.236,2.337)                       |

\* - Defined as the ratio of the EMR to the UMR (see S1 Appendix). Note that all models adjust for age and sex.
